# Supplementary material
Source: HighWire-hosted journal article supplement (https://cmajopen.ca/highwire/filestream/84913/field_highwire_adjunct_files/8/CMAJOpen-2020-0177-6-at.pdf)
Supplement: CMAJOpen-2020-0177-6-at.pdf [file CMAJOpen-2020-0177-6-at.pdf]

**Appendix 6 (as supplied by the authors):** Detailed Blinder-Oaxaca decomposition results for lifetime suicide plan

|                                | Total                  |                           |                       | Women                  |                         |                      | Men                    |                        |                     |
|--------------------------------|------------------------|---------------------------|-----------------------|------------------------|-------------------------|----------------------|------------------------|------------------------|---------------------|
|                                | Marginal Effects       | Blinder-Oaxaca            |                       | Marginal Effects       | Blinder-Oaxaca          |                      | Marginal Effects       | Blinder-Oaxaca         |                     |
|                                |                        | Explained                 | Unexplained           |                        | Explained               | Unexplained          |                        | Explained              | Unexplained         |
| <b>Indigenous Identity</b>     |                        |                           |                       |                        |                         |                      |                        |                        |                     |
| Indigenous (Ref.)              |                        |                           |                       |                        |                         |                      |                        |                        |                     |
| Non-Indigenous                 | -0.0205***<br>(0.0047) |                           |                       | -0.0258***<br>(0.0080) |                         |                      | -0.0149***<br>(0.0051) |                        |                     |
| <b>Demographic Variables</b>   |                        |                           |                       |                        |                         |                      |                        |                        |                     |
| Gender                         |                        |                           |                       |                        |                         |                      |                        |                        |                     |
| Male                           | -0.0058<br>(0.0037)    | 0.0001*<br>(6.04e-05)     | -0.0041<br>(0.0069)   |                        |                         |                      |                        |                        |                     |
| Female (Ref.)                  |                        | 0.0001*<br>(6.04e-05)     | 0.0038<br>(0.0065)    |                        |                         |                      |                        |                        |                     |
| Age                            | -0.0002<br>(0.0001)    | -0.0016<br>(0.0013)       | 0.0280<br>(0.0400)    | -7.36e-05<br>(0.0002)  | -0.0002<br>(0.0024)     | 0.0667<br>(0.1060)   | -0.00032**<br>(0.0001) | -0.0030*<br>(0.0017)   | 0.0125<br>(0.0676)  |
| Marital Status                 |                        |                           |                       |                        |                         |                      |                        |                        |                     |
| Married or common law (Ref.)   |                        | 8.99e-05<br>(0.0001)      | 0.0438<br>(0.0270)    |                        | 0.00029<br>(0.0002)     | 0.1330<br>(0.1130)   |                        | -1.56e-05<br>(0.0002)  | 0.0727<br>(0.0859)  |
| Divorced or widowed            | -0.0040<br>(0.0066)    | -0.0001<br>(9.72e-05)     | -0.0075*<br>(0.0042)  | -0.0119<br>(0.0089)    | -0.0002<br>(0.0002)     | -0.0316<br>(0.0262)  | 0.0034<br>(0.0080)     | -7.90e-06<br>(0.00014) | -0.0057<br>(0.0068) |
| Single                         | 0.0017<br>(0.0055)     | -0.0002<br>(0.0002)       | -0.0023<br>(0.0069)   | -0.0023<br>(0.0064)    | -0.0002<br>(0.0003)     | -0.00927<br>(0.0164) | 0.00360<br>(0.0078)    | -4.71e-05<br>(0.0003)  | -0.0116<br>(0.0185) |
| <b>Socioeconomic Variables</b> |                        |                           |                       |                        |                         |                      |                        |                        |                     |
| Log Equalized Household Income | -0.0039***<br>(0.0015) | -0.0011**<br>(0.0005)     | 0.0162<br>(0.1760)    | -0.0052**<br>(0.0023)  | -0.0016**<br>(0.0008)   | -0.8410<br>(0.7810)  | -0.0031*<br>(0.0016)   | -0.00077<br>(0.0007)   | 0.5620<br>(0.5350)  |
| Education                      |                        |                           |                       |                        |                         |                      |                        |                        |                     |
| Less than high school (Ref.)   |                        | -0.0007<br>(0.0005)       | 0.0022<br>(0.0048)    |                        | -0.00057<br>(0.0007)    | 0.0031<br>(0.0121)   |                        | -0.0007<br>(0.0006)    | 0.0002<br>(0.0081)  |
| High school                    | -0.0121*<br>(0.0065)   | -9.39e-05**<br>(4.76e-05) | -0.0032<br>(0.0039)   | -0.0136<br>(0.0126)    | 0.0003<br>(0.0002)      | -0.0074<br>(0.0133)  | -0.0102*<br>(0.0052)   | -0.0004<br>(0.0003)    | -0.0006<br>(0.0054) |
| Some post-secondary            | -0.0095<br>(0.0073)    | -1.55e-05<br>(2.73e-05)   | 0.0043*<br>(0.0026)   | -0.0140<br>(0.0144)    | 7.74e-05<br>(0.0001)    | 0.0126<br>(0.0125)   | -0.0046<br>(0.0063)    | 1.84e-05<br>(0.0001)   | 0.0031<br>(0.0037)  |
| Bachelor's degree or higher    | -0.0031<br>(0.0064)    | 0.0001<br>(0.0002)        | -0.0290**<br>(0.0129) | -0.00305<br>(0.0133)   | 0.00028<br>(0.0006)     | -0.0704<br>(0.0572)  | -0.0026<br>(0.0040)    | 4.68e-05<br>(0.0001)   | -0.0288<br>(0.0265) |
| Employment Status              |                        |                           |                       |                        |                         |                      |                        |                        |                     |
| Employed (Ref.)                |                        | 6.93e-05<br>(0.0002)      | 0.0161<br>(0.0133)    |                        | -2.26e-05<br>(2.35e-05) | 0.0610<br>(0.0523)   |                        | -0.0007<br>(0.0005)    | -0.0161<br>(0.0282) |
| Unemployed                     | 0.0015                 | -3.28e-05                 | -0.0095               | -0.0041                | 9.74e-05                | -0.0327              | 0.0060*                | -0.0003                | -0.0007             |

Appendix to: Hajjzadeh M, Hu M, Asada Y, et al. Explaining the gaps in psychological distress and suicidal behaviours between non-Indigenous and Indigenous adults living off-reserve in Canada: a cross-sectional study. *CMAJ Open* 2021. DOI:10.9778/cmajo.20200177. Copyright © 2021 The Author(s) or their employer(s). To receive this resource in an accessible format, please contact us at [cmajgroup@cmaj.ca](mailto:cmajgroup@cmaj.ca).

|                                        |                                |                         |                       |                                |                         |                     |                                |                         |                     |
|----------------------------------------|--------------------------------|-------------------------|-----------------------|--------------------------------|-------------------------|---------------------|--------------------------------|-------------------------|---------------------|
| Other employment status                | (0.0039)<br>-0.0015            | (0.000191)<br>-2.70e-05 | (0.0066)<br>-3.75e-05 | (0.0070)<br>-0.0087            | (0.0002)<br>-0.00034    | (0.0332)<br>-0.0013 | (0.0037)<br>0.00543            | (0.0004)<br>-6.19e-05   | (0.0095)<br>0.0028  |
| Homeownership                          | (0.0069)                       | (7.43e-05)              | (0.0022)              | (0.0131)                       | (0.0005)                | (0.0045)            | (0.0056)                       | (0.0001)                | (0.0052)            |
| Owner (Ref.)                           |                                | -0.0004<br>(0.0003)     | -0.0121<br>(0.0089)   |                                | -0.0009<br>(0.0006)     | 0.0026<br>(0.0185)  |                                | -0.00024<br>(0.0003)    | -0.0268<br>(0.0284) |
| Renter                                 | 0.0046<br>(0.0036)             | -0.0004<br>(0.0003)     | 0.00616<br>(0.0045)   | 0.0074<br>(0.0056)             | -0.00086<br>(0.0006)    | -0.0016<br>(0.0110) | 0.0017<br>(0.0047)             | -0.0002<br>(0.0003)     | 0.0118<br>(0.0125)  |
| Household Arrangement                  |                                |                         |                       |                                |                         |                     |                                |                         |                     |
| Single person (Ref.)                   |                                | 0.0005***<br>(0.0001)   | 0.0050<br>(0.0046)    |                                | 0.0008**<br>(0.0003)    | 0.0148<br>(0.0148)  |                                | 0.0002***<br>(8.82e-05) | 0.0050<br>(0.0010)  |
| Couple with no child                   | -0.0141**<br>(0.0063)          | -0.0006<br>(0.0004)     | -0.0204<br>(0.0125)   | -0.0174**<br>(0.0084)          | -0.0002<br>(0.0002)     | -0.0531<br>(0.0467) | -0.0108<br>(0.0080)            | -0.0008<br>(0.0010)     | -0.0418<br>(0.0412) |
| Couple with child(ren) younger than 25 | -0.0159**<br>(0.0063)          | 0.0002<br>(0.0002)      | 0.0027<br>(0.0109)    | -0.0158<br>(0.0100)            | -0.0006<br>(0.007)      | -0.0280<br>(0.0280) | -0.0150**<br>(0.0073)          | 0.0008<br>(0.0010)      | 0.0030<br>(0.0226)  |
| Separate with a child(ren) younger     | -0.0071<br>(0.0054)            | -2.43e-05<br>(0.0002)   | -0.0003<br>(0.0025)   | -0.0008<br>(0.0083)            | -0.00038<br>(0.0005)    | 0.00053<br>(0.0073) | -0.0167**<br>(0.0078)          | -1.00e-05<br>(1.50e-05) | 0.0047<br>(0.0044)  |
| Other household compositions           | -0.0096**<br>(0.0042)          | -8.58e-05<br>(0.0002)   | 0.0076<br>(0.0055)    | -0.0116<br>(0.0080)            | -5.69e-05<br>(0.0006)   | 0.0383<br>(0.0349)  | -0.0070*<br>(0.0040)           | -9.66e-05<br>(0.0002)   | 0.0002<br>(0.0080)  |
| <b>Geographical Factors</b>            |                                |                         |                       |                                |                         |                     |                                |                         |                     |
| Urbanicity                             |                                |                         |                       |                                |                         |                     |                                |                         |                     |
| Urban                                  | 0.0049<br>(0.0044)             | -3.09e-05<br>(2.23e-05) | 0.0115<br>(0.0129)    | 0.0047<br>(0.0075)             | -1.74e-05<br>(2.65e-05) | 0.0135<br>(0.0346)  | 0.0045<br>(0.0040)             | -5.88e-05<br>(4.23e-05) | 0.0203<br>(0.0315)  |
| Rural (Ref.)                           |                                | -3.09e-05<br>(2.23e-05) | -0.0032<br>(0.0036)   |                                | -1.74e-05<br>(2.65e-05) | -0.0035<br>(0.0090) |                                | -5.88e-05<br>(4.23e-05) | -0.0060<br>(0.0093) |
| Geographic Region                      |                                |                         |                       |                                |                         |                     |                                |                         |                     |
| Atlantic                               | -0.0019<br>(0.0041)            | 3.88e-05<br>(2.71e-05)  | 0.0047*<br>(0.0027)   | -0.0081<br>(0.0067)            | 3.09e-05<br>(2.44e-05)  | 0.0089<br>(0.0082)  | 0.0034<br>(0.0044)             | 2.87e-05<br>(5.16e-05)  | 0.0067<br>(0.0072)  |
| Quebec                                 | 0.0086<br>(0.0052)             | 0.0010<br>(0.0008)      | -0.0025<br>(0.0030)   | 0.0075<br>(0.0088)             | 0.0016<br>(0.0019)      | -0.0084<br>(0.0099) | 0.0091**<br>(0.00421)          | 0.0007<br>(0.0008)      | -0.0025<br>(0.0067) |
| Ontario, (Ref.)                        |                                | -0.0002*<br>(0.0001)    | -0.0070<br>(0.0072)   |                                | -0.0002<br>(0.0006)     | -0.0079<br>(0.0144) |                                | 0.0003**<br>(0.0001)    | -0.0090<br>(0.0148) |
| Prairie                                | 0.0071*<br>(0.0042)            | -0.0010<br>(0.0008)     | 0.0025<br>(0.0071)    | -0.0009<br>(0.0056)            | 0.0002<br>(0.0013)      | -0.0016<br>(0.0175) | 0.0131**<br>(0.0056)           | -0.0015*<br>(0.0008)    | 0.0119<br>(0.0138)  |
| British Columbia                       | 0.0046<br>(0.005)              | -2.88e-05<br>(0.0002)   | -0.0013<br>(0.0037)   | 0.0024<br>(0.0074)             | -0.0002<br>(0.0005)     | 0.0040<br>(0.0116)  | 0.0063<br>(0.0050)             | 3.87e-05<br>(0.0001)    | -0.0079<br>(0.0102) |
| Constant                               |                                |                         | -0.0925<br>(0.1790)   |                                |                         | 0.6910<br>(0.7230)  |                                |                         | -0.5920<br>(0.5360) |
| <b>Absolute Differences</b>            | <b>-0.0448***<br/>(0.0108)</b> |                         |                       | <b>-0.0507***<br/>(0.0152)</b> |                         |                     | <b>-0.0396***<br/>(0.0129)</b> |                         |                     |

Appendix to: Hajizadeh M, Hu M, Asada Y, et al. Explaining the gaps in psychological distress and suicidal behaviours between non-Indigenous and Indigenous adults living off-reserve in Canada: a cross-sectional study. *CMAJ Open* 2021. DOI:10.9778/cmajo.20200177. Copyright © 2021 The Author(s) or their employer(s). To receive this resource in an accessible format, please contact us at [cmajgroup@cmaj.ca](mailto:cmajgroup@cmaj.ca).

|                     |                        |                        |                     |                        |                       |                       |
|---------------------|------------------------|------------------------|---------------------|------------------------|-----------------------|-----------------------|
| <b>Sum</b>          | -0.0042***<br>(0.0110) | -0.0404***<br>(0.0108) | -0.0030<br>(0.0154) | -0.0477***<br>(0.0152) | -0.0068**<br>(0.0031) | -0.0329**<br>(0.0134) |
| <b>Observations</b> | 18,300                 | 10,049                 |                     | 8,251                  |                       |                       |

**Note:** Ref. = reference category in the logistic model estimation.; Marginal effects are calculated at the means of the independent variables; \*\*\* p<0.01, \*\* p<0.05, \* p<0.1
